# Supplementary material for: Fabrication of TiO2rod in tube nanostructure with enhanced photocatalytic activity: investigation of the effect of the states of the precursor on morphology
Source: Royal Society of Chemistry journal article supplement (doi:10.1039/c4ra06086e), 2014-07-30
Supplement: c4ra06086e1.pdf [file c4ra06086e1.pdf]

## Electronic Supplementary Information (ESI)

### **Fabrication of TiO<sub>2</sub> rod in tube nanostructure with enhanced photocatalytic activity: investigation on the effect of the states of precursor on morphology**

*Lei Zeng<sup>a</sup>, Wulin Song<sup>ab\*</sup>, and Changsheng Xie<sup>a</sup>*

<sup>a</sup> State Key Laboratory of Materials Processing and Die & Mould Technology, Huazhong University of Science and Technology, P. R. China. E-mail: [wulins@126.com](mailto:wulins@126.com). (W.L. Song). Tel: +86-27-87557453

<sup>b</sup> Analytical and testing center, Huazhong University of Science and Technology, P. R. China address here

**Table S1.** The data from TEM of all samples

| nm    | Average particle size | Size distribution | Thickness of shell | gap | Average diameter |
|-------|-----------------------|-------------------|--------------------|-----|------------------|
| T-2   | 26.2                  | 21-50             | 0                  | 0   | 500              |
| T-48  | 24.6                  | 13-40             | 150                | 140 | 1200             |
| T-192 | 20.3                  | 12-36             | 215                | 0   | 688              |
| ST-48 | 30.5                  | 20-42             | 131                | 201 | 914              |

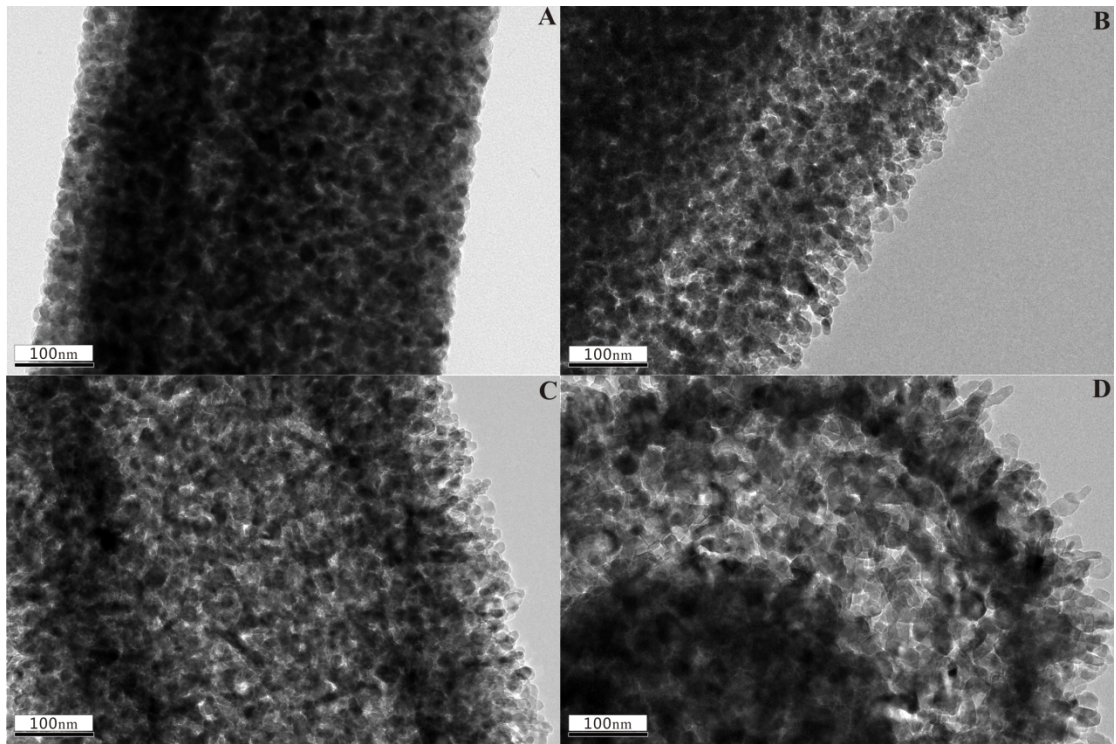

**Fig. S1** TEM micrograph for (A) T-2, (B) T-48, (C) T-192, (D) ST-48.

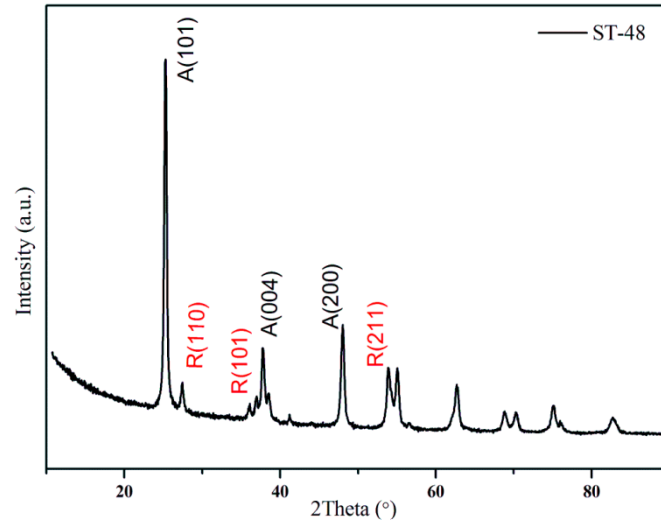

**Fig. S2** The XRD pattern of ST-48.
